# Supplementary material
Source: publisher figshare collection journal article supplement (https://karger.figshare.com/ndownloader/files/22748042)
Supplement: Supplementary file 1 [file 22748042]

**Supplemental Table 1.** Risk ratio (95% CI) for primary end-point occurrence in pre-specified risk subgroups

|  | **Events /**  **Rosuvastatin group** | **Events /**  **Atorvastatin group** | **RR**  **(95% CI)** | ***p-value*** |
| --- | --- | --- | --- | --- |
| **Age** |  |  |  |  |
| ≥ 75 years | 18 / 113 | 17 / 105 | 1.02 (0.55-1.87) | 0.99 |
| < 75 years | 11 / 242 | 10 / 249 | 0.88 (0.38-2.04) | 0.83 |
| **Gender** |  |  |  |  |
| Males | 20 / 239 | 19 / 231 | 0.98 (0.54-1.78) | 0.99 |
| Females | 9 / 116 | 8 / 123 | 0.83 (0.33-2.09) | 0.80 |
| **Diabetes mellitus** |  |  |  |  |
| yes | 10 / 95 | 8 / 85 | 0.89 (0.37-2.16) | 0.99 |
| no | 19 / 260 | 19 / 269 | 0.97 (0.52-1.78) | 0.99 |
| **Baseline LVEF** |  |  |  |  |
| ≤ 40% | 11 / 61 | 13 / 73 | 0.99 (0.48-2.04) | 0.99 |
| > 40% | 18 / 294 | 14 / 281 | 0.81 (0.41-1.6) | 0.59 |
| **Baseline eCrCl** |  |  |  |  |
| < 60 ml/min | 19 / 145 | 14 / 142 | 0.75 (0.39-1.44) | 0.46 |
| ≥ 60 ml/min | 10 / 210 | 13 / 212 | 1.28 (0.58-2.87) | 0.67 |
| **Baseline LDL** |  |  |  |  |
| ≥ 100 mg/dl | 23 / 294 | 16 / 291 | 0.70 (0.38-1.3) | 0.32 |
| < 100 mg/dl | 6 / 61 | 11 / 63 | 1.77 (0.7-4.5) | 0.29 |
| **Baseline hs-CRP** |  |  |  |  |
| ≥ 2 mg/l | 21 / 260 | 23 / 257 | 1.1 (0.63-1.95) | 0.75 |
| < 2 mg/l | 7 / 93 | 4 / 93 | 0.57 (0.17-1.88) | 0.54 |
| **Contrast Volume** |  |  |  |  |
| ≥140 ml | 17 / 165 | 13 / 168 | 0.75 (0.38-1.49) | 0.45 |
| <140 ml | 12 / 190 | 14 / 186 | 1.19 (0.57-2.5) | 0.69 |
| **AKI risk score** |  |  |  |  |
| ≥ 6 | 16 / 75 | 10 / 65 | 0.72 (0.35-1.48) | 0.39 |
| < 6 | 13 / 280 | 17 / 289 | 1.27 (0.63-2.55) | 0.58 |
| **PCI** |  |  |  |  |
| yes | 20 / 245 | 19 / 242 | 0.96 (0.53-1.76) | 0.99 |
| no | 9 / 110 | 8 / 112 | 0.87 (0.35-2.18) | 0.81 |
|  |  |  |  |  |

RR=Risk Ratio; CI=Confidence Interval; LVEF=Left Ventricular Ejection Fraction; eCrCl= estimated Creatinine Clearance; LDL= Low Density Lipoprotein; hs-CRP= high sensitivity C Reactive Protein; AKI= Acute Kidney Injury; PCI= Percutaneous Coronary Intervention.

**Supplemental Table 2.** Predictors of 30-day worsening renal function.

| **Variable** | **Risk**  **Ratio** | **95% CI** | ***p-value*** |
| --- | --- | --- | --- |
| Type of statin (Rosuvastatin or Atorvastatin) | 1.02 | 0.66-1.59 | 0.91 |
| Development of AKI | 3.93 | 2.38-6.49 | 0.0001 |
| Baseline hs-CRP≥ 2 mg/l | 2.44 | 1.03-5.76 | 0.042 |
| Baseline LVEF ≤ 40 % | 2.02 | 1.24-3.3 | 0.005 |
| Hemoglobin ≤ 10 gr/dl | 1.85 | 1.13-3.07 | 0.015 |
| Age | 1.03 | 1.01-1.06 | 0.013 |

AKI= Acute Kidney Injury; hs-CRP = high sensitivity C Reactive Protein; LVEF=Left Ventricular Ejection Fraction; CI=Confidence Intervals.
